# Supplementary material for: Principles of detecting vaporous thiols using liquid crystals and metal ion microarrays
Source: Royal Society of Chemistry journal article supplement (doi:10.1039/b810048a), 2009-01-01
Supplement: b810048a.pdf [file b810048a.pdf]

# Supporting Information for

## Principles of Detecting Vaporous Thiols Using Liquid Crystals and Metal Ion Microarrays

Huan Xu, Xinyan Bi, Xuanming Ngo, Kun-Lin Yang\*

Department of Chemical and Biomolecular Engineering, National University of  
Singapore, 4 Engineering Drive 4, Singapore, 117576

\*To whom correspondence should be addressed

Phone: +65-6516-6614

Email: [cheyk@nus.edu.sg](mailto:cheyk@nus.edu.sg)

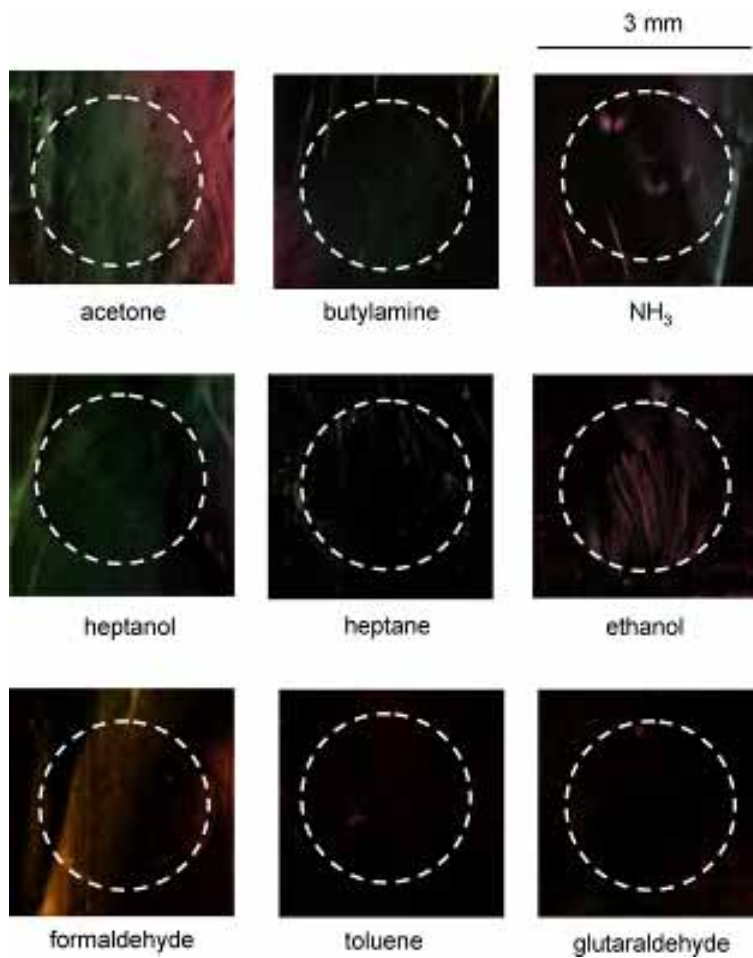

**Fig. S1** Optical micrographs of a thin layer of liquid crystal 5CB ( $\sim 6 \mu\text{m}$ ) sandwiched between a DMOAP - coated surface and an aminated surface patterned with circular domains of 1 mM of  $\text{Cu}^{2+}$  ions. Before 5CB was filled, the metal-decorated surface exposed different reagents.
